# Supplementary material for: Demonstration of self-truncated ionization injection for GeV electron beams
Source: PubMed Central journal article supplement (PMC4589762; doi:10.1038/srep14659), 2015-10-01
Supplement: srep14659-s1.pdf [file srep14659-s1.pdf]

# Supplementary Materials For

## Demonstration of self-truncated ionization injection for GeV electron beams

M. Mirzaie<sup>1,2,\*</sup>, S. Li<sup>1,2,\*</sup>, M. Zeng<sup>1,2</sup>, N. A. M. Hafz<sup>1,2</sup>, M. Chen<sup>1,2</sup>, G. Y. Li<sup>1,2</sup>, Q. J. Zhu<sup>2</sup>, H. Liao<sup>2</sup>,

T. Sokollik<sup>1,2</sup>, F. Liu<sup>1,2</sup>, Y. Y. Ma<sup>2,3</sup>, L.M. Chen<sup>2,4</sup>, Z. M. Sheng<sup>1,2,5</sup>, J. Zhang<sup>1,2</sup>

---

<sup>1</sup> Key Laboratory for Laser Plasmas (MOE) and Department of Physics and Astronomy, Shanghai Jiao Tong University, Shanghai 200240, China. <sup>2</sup> IFSA Collaborative Innovation Center, Shanghai Jiao Tong University, Shanghai 200240, China <sup>3</sup> College of Science, National University of Defense Technology, Changsha 410073, China. <sup>4</sup> Beijing National Laboratory of Condensed Matter Physics, Institute of Physics, CAS, Beijing 100190, China. <sup>5</sup> SUPA, Department of Physics, University of Strathclyde, Glasgow G4 0NG, UK. \*These authors contributed equally to this work. Correspondence and requests for materials should be addressed to N.A.M.H. (email: nasr@sjtu.edu.cn), or M.C. (email: minchen@sjtu.edu.cn), or J. Z. (email: jzhang1@sjtu.edu.cn).

### 30 TW-level laser shots (Our Results)

A series of electron energy spectra generated by 30 TW-level laser-driven 4 mm nozzle of pure He (self-injection):

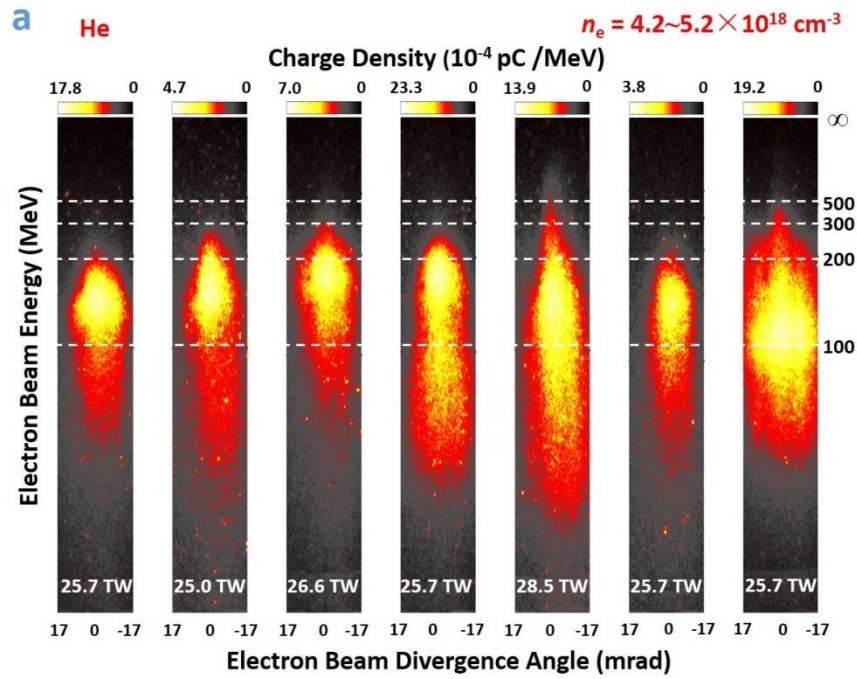

Fig. (a)

A series of electron energy spectra generated by 30 TW-level laser-driven 4 mm nozzle of helium - nitrogen gas mixtures for different nitrogen concentrations as shown on each set below:

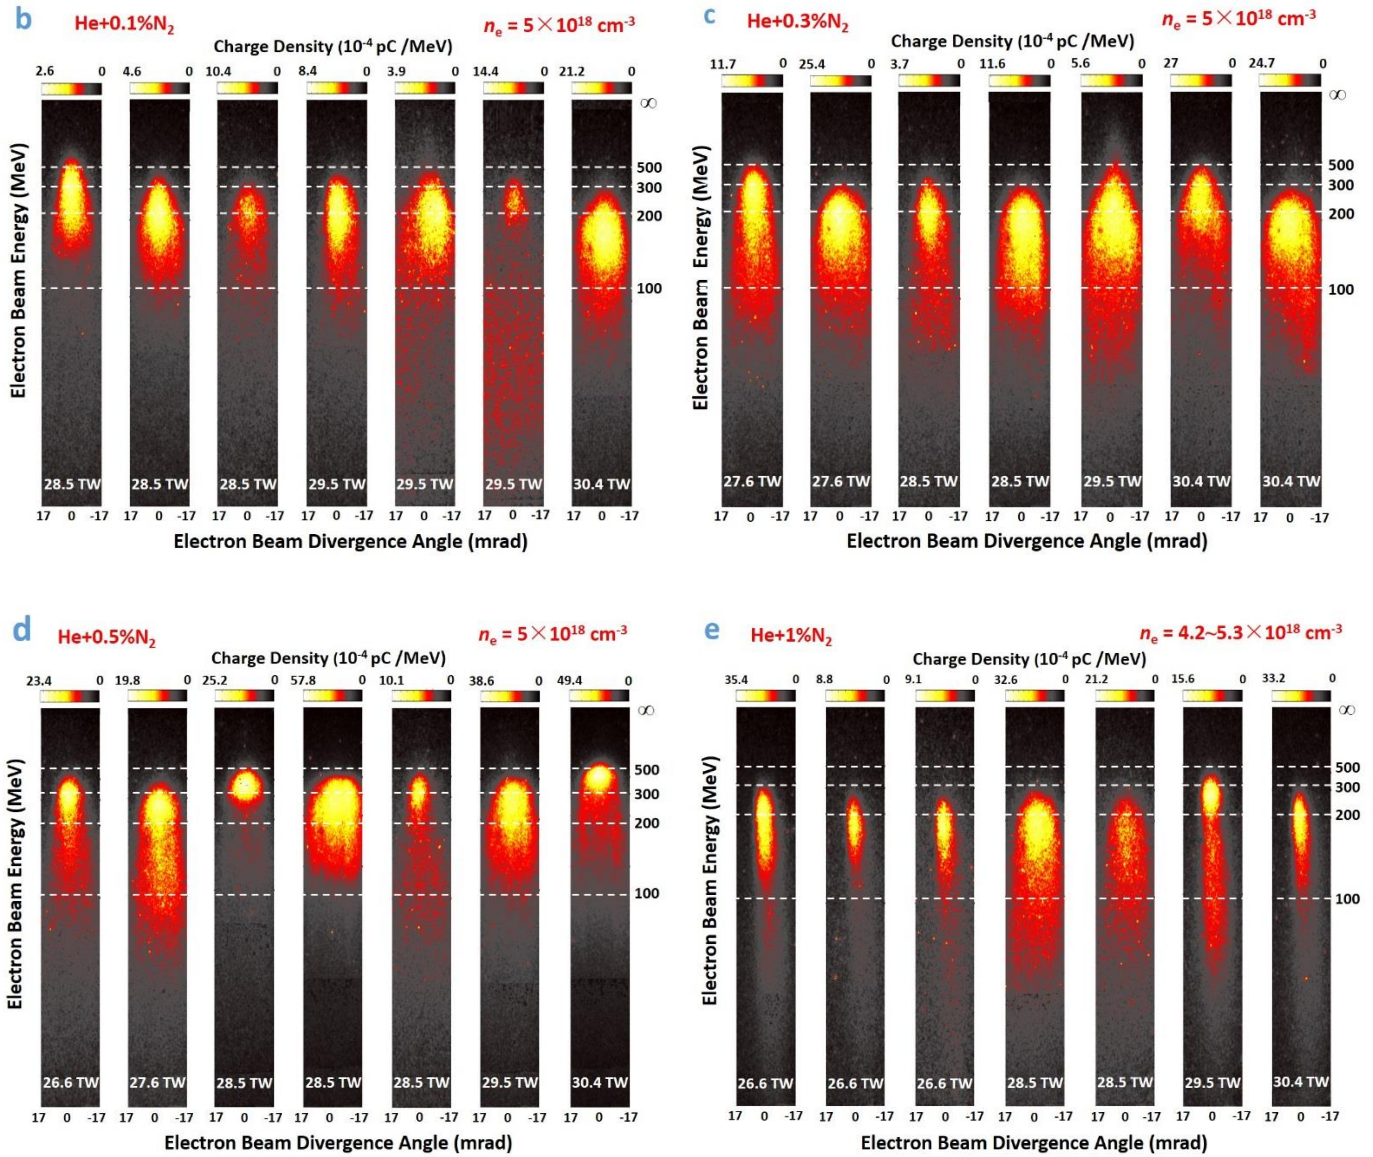

Fig. (b, c,d,e)

**Table 1. Peak Energy of 7 Typical Electron Beam Spectra in Figs. a–e**

| Nitrogen Concentration (%) | Peak Energy (MeV) |     |     |     |     |     |     | Average of Peak Energy (MeV) | 1 $\sigma$ Standard Deviation (MeV) | 2 $\sigma$ Standard Deviation (MeV) |
|----------------------------|-------------------|-----|-----|-----|-----|-----|-----|------------------------------|-------------------------------------|-------------------------------------|
|                            |                   |     |     |     |     |     |     |                              |                                     |                                     |
| 0 (pure He)                | 139               | 151 | 161 | 166 | 137 | 132 | 102 | 141                          | 21.4                                | 42.8                                |
| 0.1                        | 256               | 211 | 200 | 210 | 242 | 213 | 164 | 213                          | 29.6                                | 59.2                                |
| 0.3                        | 283               | 175 | 201 | 183 | 206 | 287 | 176 | 215                          | 48.7                                | 97.4                                |
| 0.5                        | 300               | 252 | 370 | 292 | 321 | 251 | 412 | 314                          | 59.6                                | 119.2                               |
| 1                          | 200               | 182 | 180 | 184 | 161 | 241 | 199 | 192                          | 25.1                                | 50.2                                |

**Table 2. Corresponding Energy Spread of 7 Typical Electron Beam Spectra in Figs. a–e**

| Nitrogen Concentration (%) | Corresponding Energy Spread (%) |      |      |      |      |      |      | Average of Energy Spread (%) | 1 $\sigma$ Standard Deviation (%) | 2 $\sigma$ Standard Deviation (%) |
|----------------------------|---------------------------------|------|------|------|------|------|------|------------------------------|-----------------------------------|-----------------------------------|
|                            |                                 |      |      |      |      |      |      |                              |                                   |                                   |
| 0 (pure He)                | 23                              | 27.9 | 20   | 27   | 52.6 | 39.7 | 29.2 | 31.3                         | 11.2                              | 22.4                              |
| 0.1                        | 21.3                            | 15.9 | 7.5  | 17.3 | 9.4  | 9    | 7.4  | 12.5                         | 5.6                               | 11.2                              |
| 0.3                        | 23.2                            | 5.3  | 18.3 | 10.5 | 21.4 | 18.3 | 10.7 | 15.4                         | 6.6                               | 13.2                              |
| 0.5                        | 5                               | 3.9  | 5.9  | 2.6  | 5.4  | 7    | 5.3  | 5.0                          | 1.4                               | 2.8                               |
| 1                          | 24                              | 19   | 21.4 | 7.9  | 10.8 | 9.2  | 21.8 | 16.3                         | 6.8                               | 13.6                              |

**Table 3. Corresponding Beam Charge of 7 Typical Electron Beam Spectra in Figs. a–e**

| Nitrogen Concentration (%) | Corresponding Beam Charge (pC) |      |      |      |      |      |      | Average of Beam Charge (pC) | 1 $\sigma$ Standard Deviation (pC) | 2 $\sigma$ Standard Deviation (pC) |
|----------------------------|--------------------------------|------|------|------|------|------|------|-----------------------------|------------------------------------|------------------------------------|
|                            |                                |      |      |      |      |      |      |                             |                                    |                                    |
| 0 (pure He)                | 87                             | 14   | 30   | 77   | 46   | 10   | 102  | 52.3                        | 36.7                               | 73.4                               |
| 0.1                        | 5                              | 9.2  | 20.2 | 17.3 | 35.3 | 10.1 | 48.4 | 20.7                        | 15.7                               | 31.4                               |
| 0.3                        | 26.2                           | 58.6 | 8.1  | 26.4 | 15.1 | 54.5 | 58.5 | 35.3                        | 21.4                               | 42.8                               |
| 0.5                        | 47.4                           | 45.4 | 37.8 | 109  | 20.2 | 78.7 | 79.8 | 59.8                        | 30.5                               | 61                                 |
| 1                          | 52.5                           | 13.1 | 18.2 | 79.8 | 46.2 | 27   | 47.4 | 40.6                        | 23.1                               | 46.2                               |

**Table 4. Corresponding Beam Divergence of 7 Typical Electron Beam Spectra in Figs. a–e**

| Nitrogen Concentration (%) | Corresponding Beam Divergence (mrad) |      |      |     |      |      |      | Average of Beam Divergence (mrad) | 1 $\sigma$ Standard Deviation (mrad) | 2 $\sigma$ Standard Deviation (mrad) |
|----------------------------|--------------------------------------|------|------|-----|------|------|------|-----------------------------------|--------------------------------------|--------------------------------------|
|                            | 14.5                                 | 17.5 | 17.7 | 9   | 13.8 | 19.1 | 15.6 | 15.3                              | 3.4                                  | 6.8                                  |
| 0 (pure He)                | 7.8                                  | 7.8  | 7.6  | 6.4 | 18.2 | 7.6  | 11.3 | 9.5                               | 4.1                                  | 8.2                                  |
| 0.1                        | 8                                    | 9.7  | 8.3  | 8.5 | 9.2  | 9.4  | 9.9  | 9                                 | 0.7                                  | 1.4                                  |
| 0.3                        | 7.4                                  | 9    | 7.4  | 9   | 7.1  | 10.6 | 7.1  | 8.2                               | 1.3                                  | 2.6                                  |
| 0.5                        | 6.9                                  | 6.7  | 6.7  | 8.7 | 7.6  | 6.9  | 7.8  | 7.3                               | 0.7                                  | 1.4                                  |

**Table: 5 Brief summary and comparison with relevant results**

| Author/ Group             | Journal /Year         | Injection Method                    | Laser Power & Pulse Duration | Electron Beam Energy Spectrum         | Energy spread  | Charge & Divergence  | Gas Type                                       | Target design                   | No. of Stages                  |
|---------------------------|-----------------------|-------------------------------------|------------------------------|---------------------------------------|----------------|----------------------|------------------------------------------------|---------------------------------|--------------------------------|
| C. Rechatin et al., LOA   | PRL (2009)            | Optical Injection                   | 30 TW<br>33 fs               | 170 MeV<br>single bunch               | 3.1 %<br>(rms) | 10 pC &<br>4.5 mrad  | He                                             | 3 mm<br>gas jet                 | 2 colliding<br>laser<br>pulses |
| S. Kneip et al., IC       | PRL 2009              | Self-injection                      | 200 TW<br>55 fs              | 200, 300,<br>800 MeV<br>multi-bunches | 25 %           | 90 pC &<br>3.6 mrad  | He                                             | 10 mm<br>gas jet                | Single<br>stage                |
| C. Clayton et al., UCLA   | PRL 2010              | Ionization Injection                | 110TW<br>60 fs               | 1.45 GeV<br>continuous                | 100 %          | 3.8 pC &<br>4.4 mrad | 97 % He<br>+ 3% CO <sub>2</sub>                | 13mm<br>gas cell                | Single<br>stage                |
| B. Pollock et al., UCLA   | PRL 2011              | Ionization Injection                | 60 TW<br>60 fs               | 460 MeV<br>Single bunch               | 5 %            | 35 pC &<br>2.3 mrad  | (99.5 % He<br>+ 0.5 % N <sub>2</sub> )<br>& He | 10 mm<br>gas cell               | Two stages                     |
| J.S. Liu et al., SIOM     | PRL 2011              | Ionization Injection                | 43TW<br>40 fs                | 800 MeV<br>multi-bunches              | 25 %           | 3.7pC &<br>2.6 mrad  | (94 % He<br>+ 6 % O <sub>2</sub> )<br>& He     | 4 mm<br>gas cell                | Two stages                     |
| A. Gonsalves et al., LBNL | Nature Physics (2011) | Density down-ramp                   | 40 TW<br>40 fs               | 340 MeV<br>single bunch               | 11 %           | 10 pC &<br>2.5 mrad  | He+H                                           | 33 mm<br>capillary<br>discharge | Two stages                     |
| Our work (1) SJTU         | 2015                  | Self-truncated Ionization Injection | 30 TW                        | 412 MeV<br>single bunch               | 5 %            | 80 pC &<br>7.1 mrad  | He 99.5 %<br>+N <sub>2</sub> 0.5 %             | 4 mm<br>gas jet                 | Single<br>stage                |
| Our work (2) SJTU         | 2015                  | Self-truncated Ionization Injection | 118 TW                       | 1.2 GeV<br>single bunch               | 7 %            | 16 pC &<br>4.7 mrad  | He 99.7 %<br>+N <sub>2</sub> 0.3 %             | 10 mm<br>gas jet                | Single<br>stage                |
